# **Title:** Doctors of chiropractic working with or within integrated health care delivery systems: a scoping review protocol

## **Authors:**

|                                             |                          |
|---------------------------------------------|--------------------------|
| Eric J. Roseen, DC, MSc <sup>1,2,3</sup>    | Eric.Roseen@bmc.org      |
| Aisha B. Kasali, MD, MPH <sup>1</sup>       | BKasali@hsph.harvard.edu |
| Kelsey Corcoran, DC <sup>4,5</sup>          | Kelsey.Corcoran@yale.edu |
| Kelsey Masselli <sup>1</sup>                | massellk@bu.edu          |
| Lance Laird, ThD <sup>1</sup>               | LLaird@bu.edu            |
| Robert Saper, MD, MPH <sup>1</sup>          | Robert.Saper@bmc.org     |
| Daniel P. Alford, MD, MPH <sup>6</sup>      | Dan.Alford@bmc.org       |
| Ezra Cohen, MD <sup>7</sup>                 | Ezra.Cohen@bmc.org       |
| Anthony Lisi, DC <sup>4,5</sup>             | Anthony.Lisi@yale.edu    |
| Steven J. Atlas, MD, MPH <sup>8,9</sup>     | satlas@mgh.harvard.edu   |
| Jonathan F. Bean, MD, MPH <sup>3,9,10</sup> | jonathan.bean4@va.gov    |
| Roni Evans, DC, PhD <sup>11</sup>           | evans972@umn.edu         |
| André Bussières, DC, PhD <sup>12,13</sup>   | Andre.Bussieres@uqtr.ca  |

<sup>1</sup> Department of Family Medicine, Boston University School of Medicine and Boston Medical Center, Boston, MA, USA

<sup>2</sup> Department of Rehabilitation Sciences, Massachusetts General Hospital Institute for Health Professions, Boston, MA, USA

<sup>3</sup> New England Geriatric Research Education and Clinical Center, Boston Veterans Affairs Healthcare System, Boston, MA, USA

<sup>4</sup> Pain Research, Informatics, Multimorbidities and Education (PRIME) Center, VA Connecticut Healthcare System, West Haven, CT, USA

<sup>5</sup> Yale School of Medicine, Yale University, New Haven, CT, USA

<sup>6</sup> Clinical Addiction Research and Education Unit, Section of General Internal Medicine, Boston University School of Medicine and Boston Medical Center, Boston, MA, USA

<sup>7</sup> Department of Pediatrics, Boston University School of Medicine and Boston Medical Center, Boston, MA, USA

<sup>8</sup> Division of General Internal Medicine, Massachusetts General Hospital, Boston, MA

<sup>9</sup> Harvard Medical School, Boston, MA, USA

<sup>10</sup> Spaulding Rehabilitation Hospital, Boston, MA

<sup>11</sup> Integrative Health & Wellbeing Research Program, Earl E. Bakken Center for Spirituality and Healing, University of Minnesota, Minneapolis, MN, USA

<sup>12</sup> Département Chiropratique, Université du Québec à Trois-Rivières, Trois-Rivières, Québec, Canada

<sup>13</sup> School of Physical and Occupational Therapy, Faculty of Medicine, McGill University, Montreal, Québec, Canada.

**Corresponding author:** Eric J. Roseen DC MSc, Department of Family Medicine, Boston Medical Center, One Boston Medical Center Place, Dowling 5 South, Boston, MA 02118. Tel. (701) 739-2621; Fax: (617) 414-3345; email [Eric.Roseen@bmc.org](mailto:Eric.Roseen@bmc.org)

**Funding:** Dr. Roseen is the recipient of a career development award from the National Center for Complementary and Integrative Health (K23-AT010487), which supported his work on this manuscript. The content is solely the responsibility of the authors and does not necessarily represent the official views of the National Institutes of Health.

**Word Count:**

Abstract: 300

Strengths/limitations: 134

Main text: 2597

## ABSTRACT

**Introduction:** Back and neck pain are the leading causes of disability worldwide. Doctors of chiropractic (DCs) are trained to manage these common conditions and can provide nonpharmacologic treatment aligned with international clinical practice guidelines. Although DCs practice in at least 90 countries, chiropractic care is often not available within integrated health care delivery systems. A lack of DCs in private practice, particularly in low-income communities, may also limit access to chiropractic care. Improved collaboration between medical providers and community-based DCs, or embedding DCs in medical settings such as hospitals or community health centers, will improve access to evidence-based care for musculoskeletal conditions.

**Methods and analyses:** This scoping review will map studies of DCs working with or within integrated health care delivery systems. We will use the recommended six-step approach for scoping reviews. We will search three electronic data bases including Medline, Embase, and Web of Science. Two investigators will independently review all titles and abstracts to identify relevant records, screen the full-text articles of potentially admissible records, and systematically extract data from selected articles. We will include studies published in English from 1998 to 2020 describing medical settings that have established formal relationships with community-based DCs (e.g., shared medical record) or where DCs practice in medical settings. Data extraction and reporting will be guided by the Proctor Conceptual Model for Implementation Research, which has three domains: clinical intervention; implementation strategies; and outcome measurement. Stakeholders from diverse clinical fields will offer feedback on the implications of our findings via a web-based survey.

**Ethics and dissemination:** Ethics approval will not be obtained for this review of published and publicly accessible data. Our results will be disseminated through conference presentations and a peer-reviewed publication. Our findings will inform implementation strategies that support the adoption of chiropractic care within integrated health care delivery systems.

## **Strengths and limitations of this study**

- This scoping review will be among the first to comprehensively map literature of doctors of chiropractic (DCs) working with or within military, veteran or civil integrated health care delivery systems.
- The literature search strategy is comprehensive and potentially generalizable to a global DC workforce, and relevant to other nonpharmacologic therapy providers who typically work in the community, e.g., acupuncturists, psychologists.
- A multidisciplinary team with diverse clinical and research expertise will inform our scoping review across all stages of the work.
- We have organized our search strategy and extraction form/guide around standardized terminology from the field of implementation science. It may be challenging to identify relevant studies, or extract all useful information, if original research does not use this terminology.
- Non-English articles describing the implementation of chiropractic care in a medical setting may be missed.

## INTRODUCTION

Musculoskeletal conditions, including back and neck pain, are leading causes of disability worldwide.<sup>1</sup> In the United States, the use of pharmacologic treatments, such as opioids, and invasive procedures, such as steroid injections and surgery, for low back pain, increased from 1997 to 2010.<sup>2</sup> During the same time period disability and costs from low back pain also increased.<sup>2,3</sup> In contrast to these patterns of care for spinal disorders, clinical practice guidelines emphasize the use of nonpharmacologic approaches before the use of over the counter medications, prescribed medications, or invasive procedures.<sup>4-7</sup> Yet patients who seek care in integrated health care delivery systems, at specific medical settings such as primary care clinics in hospitals or community health centers, still frequently receive prescribed medications as first line care.<sup>8,9</sup> Limited familiarity with the efficacy and role of nonpharmacologic treatments, few opportunities to practice in the same location as nonpharmacologic providers, and inadequate channels of communication between these providers have been identified as important clinician-level barriers that prevent referrals to nonpharmacologic treatments.<sup>10,11</sup> Increasing collaboration between primary care providers and providers of nonpharmacologic treatment will improve access to nonpharmacologic treatments and may improve outcomes.

Doctors of chiropractic (DCs) are trained to manage common spinal disorders, and can provide care that is aligned with international clinical practice guidelines for low back pain, lumbar spinal stenosis, neck pain, and headache.<sup>4-7,12-15</sup> Chiropractic care is typically comprised of patient evaluation and evidence-based management, including patient education, exercise instruction, spinal manipulation or mobilization, and soft tissue therapy.<sup>16,17</sup> Interestingly, patients who access chiropractic care for their low back pain are less likely than those who initiate care with a primary care provider to receive an opioid medication within one year, adjusting for sociodemographic characteristics and number of chronic conditions.<sup>8,18</sup>

Although DCs practice in at least 90 countries, chiropractic care is often unavailable in integrated health care delivery systems.<sup>19</sup> The majority of DCs practice in private clinics based in the middle- or upper-income communities<sup>20,21</sup> of high-income countries.<sup>19</sup> Limited access to chiropractic care may be most pronounced in low-income

settings where out-of-pocket costs and a scarcity of community-based DCs may limit use.<sup>22</sup> While primary care providers may encourage their patients to seek chiropractic care, limited exposure to DCs and poor channels of communication may stifle such collaboration.<sup>11</sup> Improved collaboration between medical providers and community-based DCs, or embedding DCs in medical settings, may improve access to evidence-based care for musculoskeletal conditions.

Successful expansion of chiropractic services in the Veterans Health Administration, the largest integrated health care delivery system in the United States, has demonstrated that providing chiropractic care within medical settings is feasible.<sup>23</sup> Systematic reviews have also described the delivery of chiropractic care in active duty military settings.<sup>24-26</sup> These reviews have focused on the characteristics of DCs practicing in military settings, common conditions managed by DCs, and clinical outcomes observed. A recent review evaluated implementation strategies used to increase access to musculoskeletal care within military settings, but not chiropractic care specifically.<sup>28</sup> Review authors found that implementation strategies have focused on developing collaborative models of care, supporting communication between providers and hosting educational meetings. The review also highlighted the need to understand better the steps and details of the implementation process considering their scant description in the included studies. This gap in knowledge highlights the need to further develop and evaluate implementation strategies, defined as the methods to enhance the adoption, implementation, sustainment, and scale-up of an evidence-based practice.<sup>27</sup> Furthermore, literature on the provision of chiropractic care in civil medical settings has not been systematically evaluated. Identifying strategies for implementing chiropractic care in low-income settings is particularly needed.

This scoping review aims to map studies of DCs working with or within medical settings, to identify implementation strategies used, and to describe the associated implementation and clinical outcomes. While some barriers to accessing chiropractic care may be unique, we anticipate our findings will be relevant to other providers of nonpharmacologic treatments not typically available in medical settings (e.g., acupuncturists, psychologists, and others). This scoping review is an important initial step in developing novel and testable implementation strategies that may increase

access to nonpharmacologic treatments in primary care and other medical settings and decrease the overreliance on pharmacologic-based therapies such as opioids.

## METHODS

### Overview

Scoping reviews are a flexible and comprehensive methodology that examine the amount, variety, and characteristics of a broad research question.<sup>29</sup> Our review will map literature of DCs working with or within integrated health care delivery systems, an emerging area of research. Thus, a scoping review, rather than a systematic review, is appropriate given the relatively unexplored nature of our research question.<sup>30</sup> Our scoping review protocol follows methods recommended by Arksey<sup>31</sup> and Levac<sup>32</sup> which have since been formalized by the Joanna Briggs Institute<sup>33</sup> and recent PRISMA-ScR guidelines<sup>29</sup>. Our approach involves the following six steps: 1) choosing the research question; 2) identifying relevant studies; 3) study selection; 4) charting or extracting the data; 5) collating, summarizing, and reporting the results; and 6) consultation with experts and stakeholders.

### Research question

Our study questions are guided by the Proctor Conceptual Model for Implementation Research.<sup>34</sup> The Proctor Conceptual Model identifies three important and distinct concepts in implementation research: the clinical intervention, implementation strategies, and outcome measures. Our overarching research question and three sub-questions, which map to the Proctor Conceptual model, are provided below. These are further described in the **Online Supplementary Appendix 1** and illustrated in **Figure 1**.

**Question 1:** “What is known from existing peer-reviewed literature about DCs working with or within integrated health care delivery systems?”

**Question #1a:** What are the characteristics of chiropractic care (e.g., location of service, department affiliation, conditions managed, treatments provided) in collaborative models of care that include DC and medical providers?

**Question #1b:** What implementation strategies have been used to initiate or enhance these collaborative models?

**Question #1c:** What implementation and clinical outcomes have been studied?

## **Stage 2: Identifying relevant studies**

We will identify English-language studies from 1998 to 2020 in three databases: MEDLINE, EMBASE and Web of Science. The cited references of included studies will be hand searched to identify additional potentially relevant studies. Our preliminary search strategy was developed with the assistance of the head librarian at the Boston University Medical Library (**Online Supplementary Appendix 2**). Relevant citations will be uploaded into Endnote, version X8.1 (Clarivate Analytics, Philadelphia, PA).

## **Stage 3: Study selection**

Our scoping review will include original studies that report data on DCs who work with or within medical settings. Our final eligibility criteria will be developed post hoc through an iterative team-based approach of reviewing the literature. We will consider concepts used in implementation research, which is defined as the development and evaluation of strategies to integrate evidence-based interventions within specific clinical settings.<sup>35</sup> All members of the study team will complete an open-source course developed by the National Institutes of Health (USA) comprised of six modules presenting foundational concepts in implementation research.<sup>36</sup>

## **Inclusion and exclusion criteria**

Our preliminary set of inclusion criteria is as follows: We will include peer-reviewed original research (i.e., experimental, observational, and qualitative studies) and knowledge syntheses (i.e., systematic reviews) that: (1) describe the practice or initiation of formal collaborative relationships between medical settings and community-based DCs, e.g., shared credentialing, continuing education, or electronic health record; or (2) describe the practice or implementation of chiropractic care within medical



settings, e.g., hospitals, community health centers; and (3) contribute information to one or more of the three domains of the Proctor Conceptual Model, i.e. clinical intervention, implementation strategy, or outcome measurement.<sup>34</sup>

Examples of medical settings include outpatient hospital, clinic, or other practice sites where providers include allopathic and osteopathic physicians, nurse practitioners, or physician assistants. As the provision of health care has become more complex and multidisciplinary, fewer clinicians are working in traditional independent solo or small group private practices. As a result, the medical setting of interest for this review broadly encompasses military, veteran, and civil integrated health care delivery systems. This may include closed model networks such as the Veterans Health Administration and Kaiser Permanente or hospital affiliated networks that include outpatient services such as Partners Health Care (now named Mass General Brigham) in eastern Massachusetts and Intermountain Healthcare in the Intermountain West of the United States. Common to all of these delivery systems is the provision of a wide range of health care services within the provider network.

We will exclude non-English language studies and publications that do not describe original research (e.g., guidelines, editorials, commentaries). We will exclude studies that do not involve a medical setting (e.g., effectiveness trials based in chiropractic clinics only), as well as studies focusing on medical settings but without the provision of chiropractic care within a collaborative model of care.

All titles, abstracts, and relevant full-text articles will be screened independently by two reviewers using the final eligibility criteria. A third reviewer will evaluate conflicts between reviewers. If consensus cannot be reached, a senior investigator will be consulted. The use of a third reviewer and senior investigator will help ensure that appropriate application of eligibility criteria is utilized and all discrepancies are resolved. The screening process will be facilitated by Covidence software (Veritas Health Innovation, Melbourne, Australia).

#### **Stage 4: Charting and extracting data**

A preliminary extraction form and guide developed by our multidisciplinary team are presented in **Online Supplementary Appendices 3 and 4**, respectively. Two team

members will extract information from each study, independently, using this form. This will be an iterative process, and the extraction form will be updated as necessary. The purpose of this process is to collect information that can be mapped back to the Proctor Conceptual Model as illustrated in **Figure 1**. We anticipate collecting information from the following four categories: study characteristics, chiropractic care, implementation strategies and outcome measurement. When this information is incomplete or missing from published reports, we will contact authors of eligible manuscripts to request additional documentation (e.g., unpublished reports, protocols).

### Study characteristics

We will collect information on study characteristics, e.g., study title, authors, country, year published, and journal. We will characterize the journal type, e.g., chiropractic, complementary and integrative health, general medicine, physical medicine and rehabilitation. We will identify the study design and whether a theory or framework related to implementation research or another field was used. We will indicate which stakeholders were involved in data collection (patients, clinicians, other) and how many contributed data.

### Chiropractic care

We will report the number of DCs described in each study and describe their characteristics (e.g., age, gender, years in practice), and the number of clinics represented in each manuscript. Each clinical or set of clinics will be characterized as serving military, veteran, or civil populations. If integration of DCs into multiple medical clinics is described we will indicate whether the clinics are independent of each other or part of the same integrated health care delivery system. We will extract a description of each clinical setting and characterize it as primary care (internal or family medicine), physical medicine and rehabilitation, complementary and integrative medicine, orthopedics, pain medicine, or other. We will also identify in each study the hospital or clinic department affiliation of chiropractors if applicable. We will extract information on which conditions were commonly managed by DCs (e.g., back pain, neck pain, headache), along with the treatments delivered, including guidance on patient self-care

(patient advice and education, exercise instruction), manual therapies (spinal manipulation, spinal mobilization, manual traction, soft-tissue therapy), acupuncture, therapeutic modalities (cold/ice, heat, electrical stimulation, ultrasound), and other (nutritional supplements, orthopedic supports). Extraction of information on conditions managed and treatments provided by DCs will include ICD and CPT codes when available.

### Implementation strategies

Each study will be characterized as describing a formal or informal implementation strategy or no implementation strategy. The label of 'formal' implementation strategy will be applied to studies that use the term 'implementation strategy'. Formal or informal implementation strategies will be labelled using the Expert Recommendations for Implementing Change (ERIC) taxonomy, which includes 9 domains with 73 distinct strategies.<sup>37-39</sup>

### Outcome measurement

We will identify studies that present implementation and/or clinical outcomes. Implementation outcomes include acceptability, adoption, appropriateness, feasibility, fidelity, implementation cost, penetration, and sustainability.<sup>40</sup> Clinical outcomes include pain intensity, physical function, health-related quality of life, global improvement, patient satisfaction, and adverse events.<sup>41,42</sup>

## **Stage 5: Collating, summarizing and reporting the results**

Summaries of findings from each extraction form will be entered into a matrix and emerging themes will be discussed at regular team meetings. We will provide a descriptive overview of the eligible individual studies and themes using tables and/or graphical summaries. Separate tables or graphical summaries will be used to organize information on each of the three domains of the Proctor Conceptual Model: description of chiropractic care, implementation strategies, and outcome measurement. Within each summary we will organized studies by setting (active military, veteran, civil) to help demonstrate potential similarities and differences that may impact the implementation

process. Altogether, this organization of data characteristics and themes will facilitate the development of implementation strategies that can be tailored to particular needs of an individual practice or integrated health care delivery system. The summary material will form the basis for a report which will be organized according to PRISMA-ScR guidelines.<sup>29</sup>

## **Stage 6: Consultation**

The purpose of the consultation phase is to stimulate ongoing feedback and maximize the usefulness of our findings to providers from a range of healthcare disciplines that may collaborate with DCs in routine clinical care. Consultation will involve two modes. First, our core multidisciplinary research team will provide ongoing feedback across all stages of the review. Second, we will conduct a brief online survey with a larger group of stakeholders to generate feedback on our key findings and their implications.

As we developed this protocol we formed a multidisciplinary team that will continue to offer feedback throughout the conduct of our scoping review. Monthly team meetings and ad hoc document review will serve as a vehicle for ongoing feedback. Team members represent clinical expertise in primary care (internal and family medicine), pediatrics, geriatrics, physical medicine and rehabilitation, rheumatology, pain medicine, addiction medicine, chiropractic care, and complementary and integrative medicine.

We will conduct a brief cross-sectional online survey with a larger group of stakeholders who possess expertise and interest in the purpose of this scoping review. The purpose of this survey is to generate additional feedback on our findings from a broader group of participants. Each of the members of the research team will assist in recruiting members of their disciplines to participate in the survey resulting in a convenience sample of at least 30 participants who represent a diverse range of healthcare fields. Survey questions will be administered before and after participants read a brief report that summarizes our key findings. We anticipate including a mixture of closed and open-ended questions, although questions will be determined based on findings from scoping review and discussion at team meetings.

## **ETHICS AND DISSEMINATION**

Formal ethical approval is not required to undertake this scoping review of published and publicly accessible literature. The completed scoping review will be submitted for publication to a peer-reviewed, interdisciplinary open access journal, in addition to conferences attended by primary care providers, medical specialists, and chiropractors. Our findings will form the basis of implementation strategies to support adoption of chiropractic care within integrated health care delivery systems. Ultimately, we anticipate these strategies will improve access to a broader range of evidence-based nonpharmacologic treatments for common painful musculoskeletal conditions (e.g., acupuncturists, psychologists, others), which may reduce reliance on pharmacologic-based therapies such as opioids.

## **AUTHOR CONTRIBUTIONS**

Study concept and design: Roseen, Kasali, Corcoran, Masselli, Laird, Saper, Alford, Cohen, Lisi, Atlas, Bean, Evans, Bussieres

Acquisition, analysis, or interpretation of data: n/a

Drafting of the manuscript: Roseen

Critical revision of the manuscript for important intellectual content: Roseen, Kasali, Corcoran, Masselli, Laird, Saper, Alford, Cohen, Lisi, Atlas, Bean, Evans, Bussieres

Statistical analysis: n/a

Obtained funding: n/a

Administrative, technical, or material support: Roseen, Kasali, Corcoran, Masselli

Study supervision: Roseen, Saper, Laird, Evans, Bussieres

## **FUNDING/SUPPORT**

Dr. Roseen's work on this manuscript was supported by awards from the National Center for Complementary and Integrative Health (K23-AT010487).

## **ROLE OF THE FUNDER/SPONSOR**

The funding sources had no role in the design and conduct of the study; collection, management, analysis, and interpretation of the data; preparation, review, or approval of the manuscript; and decision to submit the manuscript for publication. The contents of this manuscript are solely the responsibility of the authors and do not necessarily represent the official views of NCCIH.

**Figure 1.** Key Concepts for Scoping Review Organized by Study Question and the Three Domains of the Proctor Conceptual Model for Implementation Research

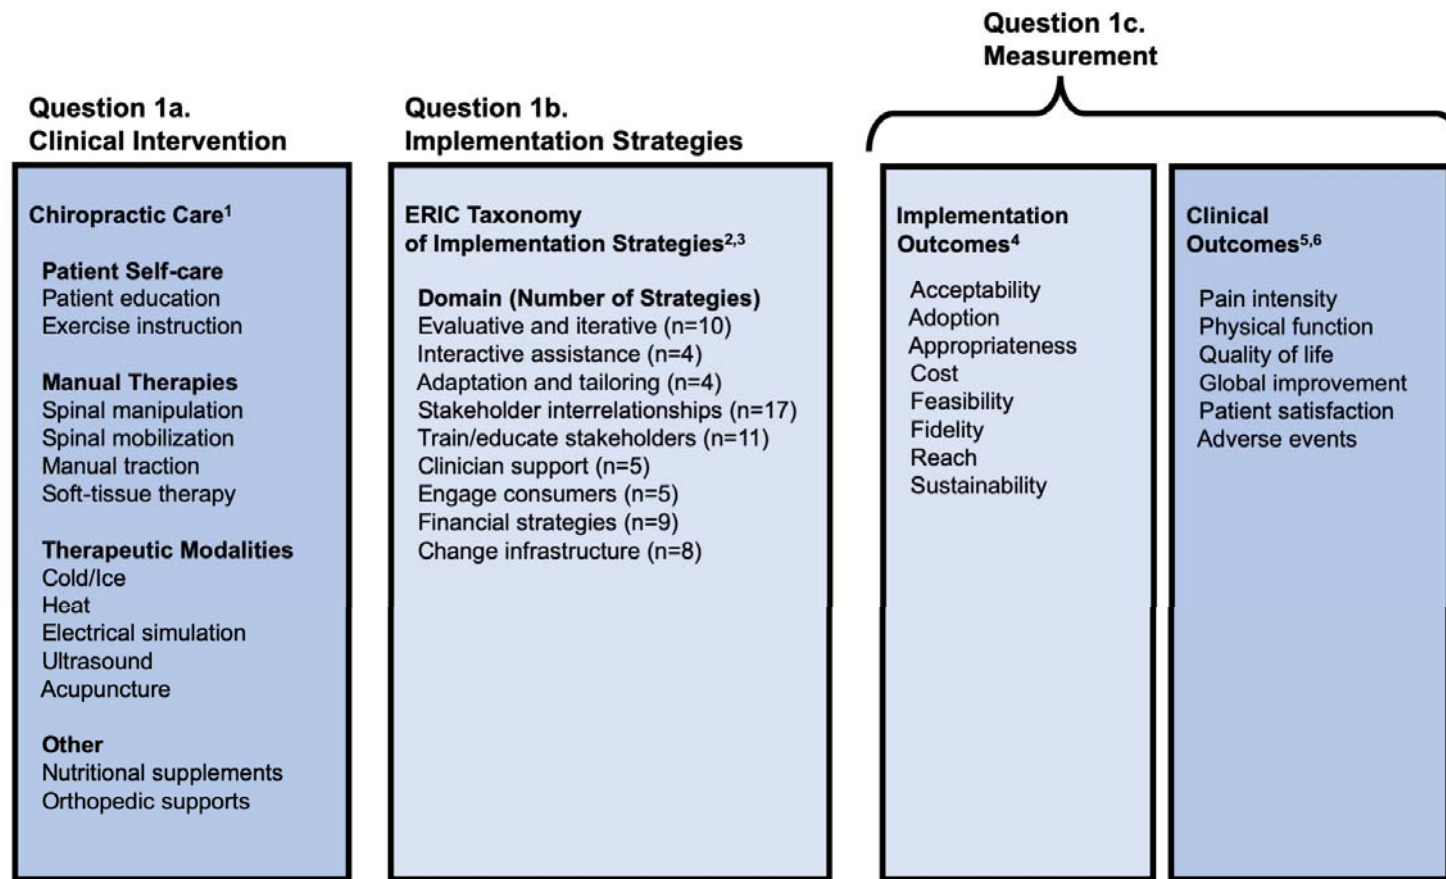

1. Beliveau 2017, 2. Powell 2015, 3. Kirchner 2018, 4. Proctor 2011, 5. Deyo 2014, 6. Chariotto 2015

## REFERENCES

1. Disease GBD, Injury I, Prevalence C. Global, regional, and national incidence, prevalence, and years lived with disability for 310 diseases and injuries, 1990-2015: a systematic analysis for the Global Burden of Disease Study 2015. *Lancet*. 2016;388(10053):1545-1602.
2. Mafi JN, McCarthy EP, Davis RB, Landon BE. Worsening trends in the management and treatment of back pain. *JAMA Intern Med*. 2013;173(17):1573-1581.
3. Dieleman JL, Cao J, Chapin A, et al. US Health Care Spending by Payer and Health Condition, 1996-2016. *JAMA*. 2020;323(9):863-884.
4. Chou R, Deyo R, Friedly J, et al. In: *Noninvasive Treatments for Low Back Pain*. Rockville (MD)2016.
5. Qaseem A, Wilt TJ, McLean RM, Forciea MA, Clinical Guidelines Committee of the American College of P. Noninvasive Treatments for Acute, Subacute, and Chronic Low Back Pain: A Clinical Practice Guideline From the American College of Physicians. *Ann Intern Med*. 2017;166(7):514-530.
6. Stochkendahl MJ, Kjaer P, Hartvigsen J, et al. National Clinical Guidelines for non-surgical treatment of patients with recent onset low back pain or lumbar radiculopathy. *Eur Spine J*. 2018;27(1):60-75.
7. Bussieres AE, Stewart G, Al-Zoubi F, et al. Spinal Manipulative Therapy and Other Conservative Treatments for Low Back Pain: A Guideline From the Canadian Chiropractic Guideline Initiative. *J Manipulative Physiol Ther*. 2018;41(4):265-293.
8. Kazis LE, Ameli O, Rothendler J, et al. Observational retrospective study of the association of initial healthcare provider for new-onset low back pain with early and long-term opioid use. *BMJ Open*. 2019;9(9):e028633.
9. Kamper SJ, Logan G, Copsey B, et al. What is usual care for low back pain? A systematic review of health care provided to patients with low back pain in family practice and emergency departments. *Pain*. 2020;161(4):694-702.
10. Atlas SJ. Management of Low Back Pain: Getting From Evidence-Based Recommendations to High-Value Care. *Ann Intern Med*. 2017;166(7):533-534.
11. Penney LS, Ritenbaugh C, Elder C, Schneider J, Deyo RA, DeBar LL. Primary care physicians, acupuncture and chiropractic clinicians, and chronic pain patients: a qualitative analysis of communication and care coordination patterns. *BMC Complement Altern Med*. 2016;16:30.
12. Cote P, Wong JJ, Sutton D, et al. Management of neck pain and associated disorders: A clinical practice guideline from the Ontario Protocol for Traffic Injury Management (OPTIMa) Collaboration. *Eur Spine J*. 2016;25(7):2000-2022.
13. Bussieres AE, Stewart G, Al-Zoubi F, et al. The Treatment of Neck Pain-Associated Disorders and Whiplash-Associated Disorders: A Clinical Practice Guideline. *J Manipulative Physiol Ther*. 2016;39(8):523-564 e527.



14. Cote P, Yu H, Shearer HM, et al. Non-pharmacological management of persistent headaches associated with neck pain: A clinical practice guideline from the Ontario protocol for traffic injury management (OPTIMa) collaboration. *Eur J Pain*. 2019;23(6):1051-1070.
15. Rousing R, Jensen RK, Fruensgaard S, et al. Danish national clinical guidelines for surgical and nonsurgical treatment of patients with lumbar spinal stenosis. *Eur Spine J*. 2019;28(6):1386-1396.
16. Beliveau PJH, Wong JJ, Sutton DA, et al. The chiropractic profession: a scoping review of utilization rates, reasons for seeking care, patient profiles, and care provided. *Chiropr Man Therap*. 2017;25:35.
17. Hartvigsen J, French SD. So, what is chiropractic? Summary and reflections on a series of papers in Chiropractic and Manual Therapies. *Chiropr Man Therap*. 2020;28(1):4.
18. Corcoran KL, Bastian LA, Gunderson CG, Steffens C, Brackett A, Lisi AJ. Association Between Chiropractic Use and Opioid Receipt Among Patients with Spinal Pain: A Systematic Review and Meta-analysis. *Pain Med*. 2020;21(2):e139-e145.
19. Stochkendahl MJ, Rezai M, Torres P, et al. The chiropractic workforce: a global review. *Chiropr Man Therap*. 2019;27:36.
20. Hurwitz EL. Epidemiology: spinal manipulation utilization. *J Electromyogr Kinesiol*. 2012;22(5):648-654.
21. Adams J, Peng W, Cramer H, et al. The Prevalence, Patterns, and Predictors of Chiropractic Use Among US Adults: Results From the 2012 National Health Interview Survey. *Spine (Phila Pa 1976)*. 2017;42(23):1810-1816.
22. Heyward J, Jones CM, Compton WM, et al. Coverage of Nonpharmacologic Treatments for Low Back Pain Among US Public and Private Insurers. *JAMA Netw Open*. 2018;1(6):e183044.
23. Lisi AJ, Brandt CA. Trends in the Use and Characteristics of Chiropractic Services in the Department of Veterans Affairs. *J Manipulative Physiol Ther*. 2016;39(5):381-386.
24. Green BN, Johnson CD, Lisi AJ, Tucker J. Chiropractic practice in military and veterans health care: The state of the literature. *J Can Chiropr Assoc*. 2009;53(3):194-204.
25. Green BN, Johnson CD, Daniels CJ, Napuli JG, Gliedt JA, Paris DJ. Integration of Chiropractic Services in Military and Veteran Health Care Facilities: A Systematic Review of the Literature. *J Evid Based Complementary Altern Med*. 2016;21(2):115-130.
26. Mior S, Sutton D, Daphne T, et al. Chiropractic services in the active duty military setting: a scoping review. *Chiropr Man Therap*. 2019;27:45.
27. Proctor EK, Powell BJ, McMillen JC. Implementation strategies: recommendations for specifying and reporting. *Implement Sci*. 2013;8:139.
28. Cancelliere C, Sutton D, Cote P, French SD, Taylor-Vaisey A, Mior SA. Implementation interventions for musculoskeletal programs of care in the active military and barriers, facilitators, and outcomes of implementation: a scoping review. *Implement Sci*. 2019;14(1):82.

29. Tricco AC, Lillie E, Zarin W, et al. PRISMA Extension for Scoping Reviews (PRISMA-ScR): Checklist and Explanation. *Ann Intern Med*. 2018;169(7):467-473.
30. Munn Z, Peters MDJ, Stern C, Tufanaru C, McArthur A, Aromataris E. Systematic review or scoping review? Guidance for authors when choosing between a systematic or scoping review approach. *BMC Med Res Methodol*. 2018;18(1):143.
31. Arksey H OML. Scoping studies: Towards a methodological framework. *Int J Soc Res Methodol*. 2005(8):19–32.
32. Levac D, Colquhoun H, O'Brien KK. Scoping studies: advancing the methodology. *Implement Sci*. 2010;5:69.
33. Institute TJB. *Joanna Briggs Institute Reviewers' Manual 2015*. <http://joannabriggs.org/assets/docs/sumari/Reviewers-Manual Methodology-for-JBI-Scoping-Reviews 2015 v2.pdf2015>.
34. Proctor EK, Landsverk J, Aarons G, Chambers D, Glisson C, Mittman B. Implementation research in mental health services: an emerging science with conceptual, methodological, and training challenges. *Adm Policy Ment Health*. 2009;36(1):24-34.
35. Brownson RC CG, Proctor EK. *Dissemination and Implementation Research In Health*. New York, NY: Oxford University Press; 2018.
36. National Cancer Institute. Training Institute for Dissemination and Implementation Research in Cancer (TIDIRC) OpenAccess. <https://cancercontrol.cancer.gov/IS/training-education/tidirc/openaccess.html>. Accessed July 21, 2020.
37. Powell BJ, McMillen JC, Proctor EK, et al. A compilation of strategies for implementing clinical innovations in health and mental health. *Med Care Res Rev*. 2012;69(2):123-157.
38. Powell BJ, Waltz TJ, Chinman MJ, et al. A refined compilation of implementation strategies: results from the Expert Recommendations for Implementing Change (ERIC) project. *Implement Sci*. 2015;10:21.
39. Kirchner JE WT, Powell BJ, Smith JL, Proctor EK. Implementation Strategies. In: Brownson R PE, Colditz G, ed. *Dissemination and Implementation Research in Health: Translating Science to Practice*. New York: Oxford University Press; 2018:245-266.
40. Proctor E, Silmere H, Raghavan R, et al. Outcomes for implementation research: conceptual distinctions, measurement challenges, and research agenda. *Adm Policy Ment Health*. 2011;38(2):65-76.
41. Deyo RA, Dworkin SF, Amtmann D, et al. Report of the NIH Task Force on research standards for chronic low back pain. *J Pain*. 2014;15(6):569-585.
42. Chiarotto A, Boers M, Deyo RA, et al. Core outcome measurement instruments for clinical trials in nonspecific low back pain. *Pain*. 2018;159(3):481-495.

## Appendices

**Online Supplementary Appendix 1:** Description of conceptual framework

**Online Supplementary Appendix 2:** Search strategy

**Online Supplementary Appendix 3:** Extraction form

**Online Supplementary Appendix 4:** Extraction guide

## Online Supplementary Appendix 1. Description of conceptual framework

**Implementation science** is “the scientific study of methods to promote the systematic uptake of research findings and other evidence-based practices into routine practice, and hence, to improve quality and effectiveness of health services”.<sup>1</sup>

The **Proctor Conceptual Model** guides the process of evaluating both implementation and clinical outcomes of a specific clinical intervention. The Proctor Conceptual Model for the study of Implementation Research comprises three domains: clinical intervention, implementation strategies and outcome measurement.<sup>2</sup>

**Clinical Interventions** are evidence-based practices. The clinical intervention of interest in this scoping review is chiropractic care, which includes evaluation and treatment. Common treatments provided by DCs for back and neck pain include joint manipulation, soft tissue therapy, patient education, and exercise instruction.<sup>3,4</sup> These approaches align with clinical practice guidelines for back pain, neck pain, and headache.<sup>5-12</sup>

**Implementation strategies** are defined as methods to enhance the adoption, implementation, sustainment, and scale-up of an innovation.<sup>13</sup> Implementation strategies address facilitators and/or barriers to successful implementation at one or more socioecological levels, such as policy, systems environment, organizational structure, individual providers, and consumers. Furthermore, implementation strategies influence the uptake of the ‘clinical intervention’ through addressing barriers at one or more levels of influence (e.g. patient-, provider-, clinic-, and health-system factors) to facilitate implementation. The Expert Recommendations for implementing Change (ERIC) Project taxonomy is a comprehensive organized list of implementation strategies.<sup>14-16</sup> The ERIC Project encompasses a set of 73 implementation strategies across 9 domains.

**Outcome measurement**, in the Proctor Conceptual Model, differentiates implementation and clinical outcomes. Successful implementation is thought to be necessary for clinically efficacious interventions to be effective in real world settings.<sup>2</sup> The Proctor Conceptual Model identifies and defines eight core implementation outcomes.<sup>17</sup> Three of these implementation outcomes (acceptability, appropriateness, feasibility) are strong predictors of implementation success,

sometimes considered pre-implementation outcomes. The other five (reach, adoption, fidelity, cost, penetration, and sustainability) are typically used to evaluate effectiveness of implementation strategies. Important clinical outcomes for adults with common musculoskeletal conditions include pain, physical function, quality of life, and patient satisfaction.<sup>18,19</sup>

## Online Supplementary Appendix 2: Preliminary search strategy

|                       |                                                                                                                                                                                                                                                                                                                                                                                                                                                                                                                                                                                                                                                                                                                                                                                                                                                                                                                                                                                                                                                                                                                                                                                                                                                                                                                                                                                                                                                                                                                                                                                                                                                                                                                                                                  |
|-----------------------|------------------------------------------------------------------------------------------------------------------------------------------------------------------------------------------------------------------------------------------------------------------------------------------------------------------------------------------------------------------------------------------------------------------------------------------------------------------------------------------------------------------------------------------------------------------------------------------------------------------------------------------------------------------------------------------------------------------------------------------------------------------------------------------------------------------------------------------------------------------------------------------------------------------------------------------------------------------------------------------------------------------------------------------------------------------------------------------------------------------------------------------------------------------------------------------------------------------------------------------------------------------------------------------------------------------------------------------------------------------------------------------------------------------------------------------------------------------------------------------------------------------------------------------------------------------------------------------------------------------------------------------------------------------------------------------------------------------------------------------------------------------|
| <b>Pubmed</b>         | <p>(((((("Referral and Consultation"[Mesh] OR "Interprofessional Relations"[Mesh] OR Implementation[Title/Abstract] OR Implement[Title/Abstract] OR Implemented[Title/Abstract] OR Integration[Title/Abstract] OR Integrated[Title/Abstract] OR Integrate[Title/Abstract] OR Dissemination[Title/Abstract] OR Disseminate[Title/Abstract] OR Disseminated[Title/Abstract] OR Roll out[Title/Abstract] OR Knowledge translation[Title/Abstract] OR Knowledge transfer[Title/Abstract] OR interdisciplinary[Title/Abstract] OR multidisciplinary[Title/Abstract])) AND (("Chiropractic"[Mesh] OR "Manipulation, Chiropractic"[Mesh] OR "Manipulation, Spinal"[Mesh] OR Chiropractic[Title/Abstract] OR Chiropractor[Title/Abstract] OR Spinal manipulation[Title/Abstract] OR Manual therapy[Title/Abstract] OR Non-pharmacologic[Title/Abstract] OR Spine care[Title/Abstract])) AND ("Hospitals"[Mesh] OR "Delivery of Health Care"[Mesh] OR "Academic Medical Centers"[Mesh] OR "Health Facilities"[Mesh] OR Health care[Title/Abstract] OR Health care service[Title/Abstract] OR Healthcare[Title/Abstract] OR Healthcare service[Title/Abstract] OR Hospital[Title/Abstract] OR Health services research[Title/Abstract] OR Primary care[Title/Abstract] OR Community health center[Title/Abstract] OR Veteran's affairs[Title/Abstract] OR Veterans affairs[Title/Abstract] OR Utilization[Title/Abstract] OR Delivery[Title/Abstract] OR Service[Title/Abstract] OR Services[Title/Abstract] OR Hospital program[Title/Abstract] OR Hospital programs[Title/Abstract] OR Tertiary service[Title/Abstract] OR Tertiary services[Title/Abstract] OR medical center[Title/Abstract])) AND ( "1998/01/01"[Pdat] : "3000/12/31"[Pdat] ) AND English[lang]))</p> |
| <b>Web of Science</b> | <p>TS=(refer* OR consult* OR interprofessional relation* OR implement* OR integrat* OR disseminat* OR roll out OR knowledge trans* OR multidisciplin* OR interdisciplin*)</p> <p>AND</p> <p>TS=(chiroprac* OR spin* manipulat* OR "manual therap*" OR non-pharmacologic OR spine care)</p> <p>AND</p> <p>TS=(hospital OR hospitals OR health center* OR health facilit* OR primary care OR community health center* OR veterans affairs OR veteran's affairs OR medical center*)</p>                                                                                                                                                                                                                                                                                                                                                                                                                                                                                                                                                                                                                                                                                                                                                                                                                                                                                                                                                                                                                                                                                                                                                                                                                                                                             |

|               |                                                                                                                                                                                                                                                                                                                                                                                                                                                                                                                                                                                                                                                                                                                                                                                                                                                                                                                                                                                                                 |
|---------------|-----------------------------------------------------------------------------------------------------------------------------------------------------------------------------------------------------------------------------------------------------------------------------------------------------------------------------------------------------------------------------------------------------------------------------------------------------------------------------------------------------------------------------------------------------------------------------------------------------------------------------------------------------------------------------------------------------------------------------------------------------------------------------------------------------------------------------------------------------------------------------------------------------------------------------------------------------------------------------------------------------------------|
| <b>Embase</b> | <p>('patient referral'/exp OR 'public relations'/exp OR 'implementation'/exp OR 'integration'/exp OR 'dissemination'/exp OR 'knowledge translation'/exp OR 'knowledge transfer'/exp OR 'implement*':ab,ti OR 'integrat*':ab,ti OR 'disseminat*':ab,ti OR 'roll out':ab,ti OR 'knowledge translat*':ab,ti OR 'knowledge transfer*':ab,ti OR 'multidisciplin*':ab,ti OR 'interdisciplin*':ab,ti</p> <p>AND</p> <p>'chiropractic'/exp OR 'chiropractor'/exp OR 'chiropractic practice'/exp OR 'chiropractic manipulation'/exp OR 'spine manipulation'/exp OR 'chiropract*':ab,ti OR 'spinal manipul*':ab,ti OR 'manual therapy':ab,ti OR 'non-pharmacologic':ab,ti OR 'spine care':ab,ti</p> <p>AND</p> <p>'health care facility'/exp OR 'primary medical care'/exp OR 'veterans affairs hospital'/exp OR 'hospital':ab,ti OR 'health services research':ab,ti OR 'primary care':ab,ti OR 'community health center':ab,ti OR 'veterans affairs':ab,ti OR 'hospital program*':ab,ti OR 'medical center*':ab,ti)</p> |
|---------------|-----------------------------------------------------------------------------------------------------------------------------------------------------------------------------------------------------------------------------------------------------------------------------------------------------------------------------------------------------------------------------------------------------------------------------------------------------------------------------------------------------------------------------------------------------------------------------------------------------------------------------------------------------------------------------------------------------------------------------------------------------------------------------------------------------------------------------------------------------------------------------------------------------------------------------------------------------------------------------------------------------------------|

### Online Supplementary Appendix 3. Extraction form

| Reviewer:                    |                                                                                                                                                                                                                                                                                       |                                                |
|------------------------------|---------------------------------------------------------------------------------------------------------------------------------------------------------------------------------------------------------------------------------------------------------------------------------------|------------------------------------------------|
| Date:                        |                                                                                                                                                                                                                                                                                       |                                                |
| <b>Study characteristics</b> |                                                                                                                                                                                                                                                                                       |                                                |
| Variable                     | Category                                                                                                                                                                                                                                                                              | Notes / Excerpts from manuscript (page number) |
| Study title                  | <input type="checkbox"/> _____<br>(please specify)                                                                                                                                                                                                                                    |                                                |
| First author                 | <input type="checkbox"/> _____<br>(please specify)                                                                                                                                                                                                                                    |                                                |
| Publication year             | <input type="checkbox"/> _____<br>(please specify)                                                                                                                                                                                                                                    |                                                |
| Study country                | <input type="checkbox"/> _____<br>(please specify)                                                                                                                                                                                                                                    |                                                |
| Journal                      | Journal name _____<br>(please specify)<br><br>Select category<br><input type="checkbox"/> Chiropractic<br><input type="checkbox"/> Complementary and integrative health<br><input type="checkbox"/> General medicine<br><input type="checkbox"/> Physical medicine and rehabilitation |                                                |



|                                                |                                                                                                                                                                                                                                                                                                                                                                                                |  |
|------------------------------------------------|------------------------------------------------------------------------------------------------------------------------------------------------------------------------------------------------------------------------------------------------------------------------------------------------------------------------------------------------------------------------------------------------|--|
|                                                | <input type="checkbox"/> Other<br>(please specify: _____)                                                                                                                                                                                                                                                                                                                                      |  |
| Number of medical settings represented         | Name of integrated health care delivery system:<br>_____<br>(please specify)<br><br>How many clinics in study? _____<br>(please specify)<br><br>If multiple, are they:<br><input type="checkbox"/> Independent<br><input type="checkbox"/> Part of same healthcare system<br><input type="checkbox"/> Unclear<br>(please specify: _____)                                                       |  |
| Departmental affiliation of medical setting(s) | <input type="checkbox"/> Internal medicine<br><input type="checkbox"/> Family medicine<br><input type="checkbox"/> Physical medicine/rehabilitation<br><input type="checkbox"/> Integrative medicine<br><input type="checkbox"/> Orthopedics<br><input type="checkbox"/> Pain medicine<br><input type="checkbox"/> Other<br>(please specify: _____)<br><input type="checkbox"/> Not applicable |  |

|                                             |                                                                                                                                                                                                                                                                                                                                                                                                |  |
|---------------------------------------------|------------------------------------------------------------------------------------------------------------------------------------------------------------------------------------------------------------------------------------------------------------------------------------------------------------------------------------------------------------------------------------------------|--|
| Characteristics of DCs                      | <input type="checkbox"/> Number of DCs<br>(please specify: _____)<br><input type="checkbox"/> Average age<br>(please specify: _____)<br><input type="checkbox"/> Gender<br>(please specify: _____ % female)<br><input type="checkbox"/> Average Years in practice<br><input type="checkbox"/> Department affiliation<br>(please specify: _____)                                                |  |
| Departmental affiliation of medical setting | <input type="checkbox"/> Internal medicine<br><input type="checkbox"/> Family medicine<br><input type="checkbox"/> Physical medicine/rehabilitation<br><input type="checkbox"/> Integrative medicine<br><input type="checkbox"/> Orthopedics<br><input type="checkbox"/> Pain medicine<br><input type="checkbox"/> Other<br>(please specify: _____)<br><input type="checkbox"/> Not applicable |  |
| Study design                                | <input type="checkbox"/> Systematic review<br><input type="checkbox"/> Observational/Cross-sectional<br><input type="checkbox"/> Observational/Longitudinal<br><input type="checkbox"/> Qualitative<br><input type="checkbox"/> Mixed-methods<br><input type="checkbox"/> Randomized control trial<br><input type="checkbox"/> Other<br>(please specify: _____)                                |  |

|                                                 |                                                                                                                                                                                                                                                                                                                                                                                    |  |
|-------------------------------------------------|------------------------------------------------------------------------------------------------------------------------------------------------------------------------------------------------------------------------------------------------------------------------------------------------------------------------------------------------------------------------------------|--|
| Description of patient population               | Indicate the proportion of patients seen for the following conditions:<br><input type="checkbox"/> Back pain<br>(please specify: _____%)<br><input type="checkbox"/> Neck pain<br>(please specify: _____%)<br><input type="checkbox"/> Headache<br>(please specify: _____%)<br><input type="checkbox"/> Other<br>(please specify: _____%)<br><input type="checkbox"/> Not Reported |  |
| <b>Clinical intervention: Chiropractic care</b> |                                                                                                                                                                                                                                                                                                                                                                                    |  |
| Patient Self-care                               | <input type="checkbox"/> Patient Education<br><input type="checkbox"/> Exercise Instruction                                                                                                                                                                                                                                                                                        |  |
| Manual Therapies                                | <input type="checkbox"/> Spinal Manipulation<br><input type="checkbox"/> Spinal Mobilization<br><input type="checkbox"/> Manual Traction<br><input type="checkbox"/> Soft-tissue Therapy                                                                                                                                                                                           |  |
| Therapeutic Modalities                          | <input type="checkbox"/> Cold/ice<br><input type="checkbox"/> Heat<br><input type="checkbox"/> Electrical Simulation<br><input type="checkbox"/> Ultrasound<br><input type="checkbox"/> Acupuncture                                                                                                                                                                                |  |
| Other                                           | <input type="checkbox"/> Nutritional Supplements<br><input type="checkbox"/> Orthopedic Supports                                                                                                                                                                                                                                                                                   |  |

| Implementation strategies                |                                                                                                                                                                                                                                                                                                                                                                                                                                                                                                                                                                                                                                                                                                                               |  |
|------------------------------------------|-------------------------------------------------------------------------------------------------------------------------------------------------------------------------------------------------------------------------------------------------------------------------------------------------------------------------------------------------------------------------------------------------------------------------------------------------------------------------------------------------------------------------------------------------------------------------------------------------------------------------------------------------------------------------------------------------------------------------------|--|
| Description on implementation strategies | Which best characterizes the description of implementation strategies in manuscript?<br><input type="checkbox"/> No description<br><input type="checkbox"/> Informal<br><input type="checkbox"/> Formal                                                                                                                                                                                                                                                                                                                                                                                                                                                                                                                       |  |
| ERIC taxonomy                            | If formal/informal description of implementation strategies is available, which of the 79 implementation strategies listed below were described?                                                                                                                                                                                                                                                                                                                                                                                                                                                                                                                                                                              |  |
| Evaluative and iterative strategies      | <input type="checkbox"/> Assess for readiness and identify barriers and facilitators<br><input type="checkbox"/> Audit and provide feedback<br><input type="checkbox"/> Conduct cyclical small tests of change<br><input type="checkbox"/> Conduct local needs assessment<br><input type="checkbox"/> Develop a formal implementation blueprint<br><input type="checkbox"/> Develop and implement tools for quality monitoring<br><input type="checkbox"/> Develop and organize quality monitoring systems<br><input type="checkbox"/> Obtain and use patient s/consumers and family feedback<br><input type="checkbox"/> Purposefully reexamine the implementation<br><input type="checkbox"/> Stage implementation scale up |  |

|                                        |                                                                                                                                                                                                                                                                                                                                                                                                                                                                                                                                                                                                                                                                                                                                                                                                                                                                                                                                                                                                                             |  |
|----------------------------------------|-----------------------------------------------------------------------------------------------------------------------------------------------------------------------------------------------------------------------------------------------------------------------------------------------------------------------------------------------------------------------------------------------------------------------------------------------------------------------------------------------------------------------------------------------------------------------------------------------------------------------------------------------------------------------------------------------------------------------------------------------------------------------------------------------------------------------------------------------------------------------------------------------------------------------------------------------------------------------------------------------------------------------------|--|
| Interactive assistance                 | <input type="checkbox"/> Centralize technical assistance<br><input type="checkbox"/> Facilitation<br><input type="checkbox"/> Provide clinical supervision<br><input type="checkbox"/> Provide local technical assistance                                                                                                                                                                                                                                                                                                                                                                                                                                                                                                                                                                                                                                                                                                                                                                                                   |  |
| Adapt and tailor to context            | <input type="checkbox"/> Promote adaptability<br><input type="checkbox"/> Tailor strategies<br><input type="checkbox"/> Use data experts<br><input type="checkbox"/> Use data warehousing techniques                                                                                                                                                                                                                                                                                                                                                                                                                                                                                                                                                                                                                                                                                                                                                                                                                        |  |
| Develop stakeholder interrelationships | <input type="checkbox"/> Build a coalition<br><input type="checkbox"/> Capture and share local knowledge<br><input type="checkbox"/> Conduct local consensus discussions<br><input type="checkbox"/> Develop academic partnerships<br><input type="checkbox"/> Develop an implementation glossary<br><input type="checkbox"/> Identify and prepare champions<br><input type="checkbox"/> Identify early adopters<br><input type="checkbox"/> Inform local opinion leaders<br><input type="checkbox"/> Involve executive boards<br><input type="checkbox"/> Model and stimulate change<br><input type="checkbox"/> Obtain formal commitments<br><input type="checkbox"/> Organize clinician implementation team meetings<br><input type="checkbox"/> Promote network weaving<br><input type="checkbox"/> Recruit, designate, and train for leadership<br><input type="checkbox"/> Use advisory boards and workgroups<br><input type="checkbox"/> Use an implementation advisor<br><input type="checkbox"/> Visit other sites |  |

|                                |                                                                                                                                                                                                                                                                                                                                                                                                                                                                                                                                                                                                                                                       |  |
|--------------------------------|-------------------------------------------------------------------------------------------------------------------------------------------------------------------------------------------------------------------------------------------------------------------------------------------------------------------------------------------------------------------------------------------------------------------------------------------------------------------------------------------------------------------------------------------------------------------------------------------------------------------------------------------------------|--|
| Train and educate stakeholders | <input type="checkbox"/> Conduct educational meetings<br><input type="checkbox"/> Conduct educational outreach visits<br><input type="checkbox"/> Conduct ongoing training<br><input type="checkbox"/> Create a learning collaborative<br><input type="checkbox"/> Develop educational materials<br><input type="checkbox"/> Distribute educational materials<br><input type="checkbox"/> Make training dynamic<br><input type="checkbox"/> Provide ongoing consultation<br><input type="checkbox"/> Shadow other experts<br><input type="checkbox"/> Use train-the-trainer strategies<br><input type="checkbox"/> Work with educational institutions |  |
| Support clinicians             | <input type="checkbox"/> Create new clinical teams<br><input type="checkbox"/> Develop resource sharing agreements<br><input type="checkbox"/> Facilitate relay of clinical data to providers<br><input type="checkbox"/> Remind clinicians<br><input type="checkbox"/> Revise professional roles                                                                                                                                                                                                                                                                                                                                                     |  |
| Engage consumers               | <input type="checkbox"/> Increase demand<br><input type="checkbox"/> Intervene with patients/consumers to enhance uptake and adherence<br><input type="checkbox"/> Involve patients/consumers and family members<br><input type="checkbox"/> Prepare patients/consumers to be active participants<br><input type="checkbox"/> Use mass media                                                                                                                                                                                                                                                                                                          |  |

|                              |                                                                                                                                                                                                                                                                                                                                                                                                                                                                                                                                             |  |
|------------------------------|---------------------------------------------------------------------------------------------------------------------------------------------------------------------------------------------------------------------------------------------------------------------------------------------------------------------------------------------------------------------------------------------------------------------------------------------------------------------------------------------------------------------------------------------|--|
| Utilize financial strategies | <input type="checkbox"/> Access new funding<br><input type="checkbox"/> Alter incentive/allowance structures<br><input type="checkbox"/> Alter patient/consumer fees<br><input type="checkbox"/> Develop disincentives<br><input type="checkbox"/> Fund and contract for the clinical innovation<br><input type="checkbox"/> Make billing easier<br><input type="checkbox"/> Place innovation on fee for service lists/formularies<br><input type="checkbox"/> Use capitated payments<br><input type="checkbox"/> Use other payment schemes |  |
| Change infrastructure        | <input type="checkbox"/> Change accreditation or membership requirements<br><input type="checkbox"/> Change liability laws<br><input type="checkbox"/> Change physical structure and equipment<br><input type="checkbox"/> Change record systems<br><input type="checkbox"/> Change service sites<br><input type="checkbox"/> Create or change credentialing and/or licensure standards<br><input type="checkbox"/> Mandate change<br><input type="checkbox"/> Start a dissemination organization                                           |  |

| Outcome measurement     |                                                                                                                                                                                                                                                                                                                                         |  |
|-------------------------|-----------------------------------------------------------------------------------------------------------------------------------------------------------------------------------------------------------------------------------------------------------------------------------------------------------------------------------------|--|
| Implementation outcomes | <input type="checkbox"/> Acceptability<br><input type="checkbox"/> Adoption<br><input type="checkbox"/> Appropriateness<br><input type="checkbox"/> Feasibility<br><input type="checkbox"/> Fidelity<br><input type="checkbox"/> Implementation Cost<br><input type="checkbox"/> Penetration<br><input type="checkbox"/> Sustainability |  |
| Clinical outcomes       | <input type="checkbox"/> Pain intensity<br><input type="checkbox"/> Physical functioning<br><input type="checkbox"/> Health-related quality of life<br><input type="checkbox"/> Global improvement<br><input type="checkbox"/> Patient satisfaction<br><input type="checkbox"/> Adverse events                                          |  |



## Online Supplementary Appendix 4. Extraction guide

### Clinical intervention: Chiropractic care

| Clinical Intervention                          | Treatment                             | Description                                                                                                                                                                                                                                                                                                                                           |
|------------------------------------------------|---------------------------------------|-------------------------------------------------------------------------------------------------------------------------------------------------------------------------------------------------------------------------------------------------------------------------------------------------------------------------------------------------------|
| Components of chiropractic care <sup>1-3</sup> | Spinal manipulation                   | Manual therapy applied to the spine that involves a high velocity, low amplitude impulse or thrust applied at or near the end of a joint's passive range of motion.                                                                                                                                                                                   |
|                                                | Soft-tissue therapy                   | Refers to active or passive manual therapies in which soft tissues (muscles, tendons, or ligaments) are actively engaged, e.g., myofascial release, muscle energy technique, or are passively pressed and kneaded by hand or with mechanical devices, e.g., massage.                                                                                  |
|                                                | Patient education                     | A process to enable individuals to make informed decisions about their personal health-related behavior, e.g., Pamphlets, books, videos, neck schools, discussion with healthcare providers. Content may include general back pain information, neuroscience of pain, instruction in ergonomics, principles of self-relaxation/CBT, etc.              |
|                                                | Nutritional supplements               | A product intended to supplement the diet, taken by mouth, containing one or more dietary ingredients, e.g., vitamins, minerals, herbs or other botanicals, amino acids, enzymes, tissues from organs or glands, or extracts of these.                                                                                                                |
|                                                | Exercise instruction and prescription | Exercise refers to any series of movements with the aim of training or developing the body by routine practice or as physical training to promote good physical health. Exercise therapy includes a wide variety of techniques common for the treatment and rehabilitation of neck pain. E.g., Strengthening, flexibility, stretching/range of motion |
|                                                | Cold/Ice                              | Physico-chemical modalities use thermal effect, such as cold at the skin level, affecting structures beneath the skin.                                                                                                                                                                                                                                |

|                               |                                                                                                                                                                                                                                                                                                                                                                                                |
|-------------------------------|------------------------------------------------------------------------------------------------------------------------------------------------------------------------------------------------------------------------------------------------------------------------------------------------------------------------------------------------------------------------------------------------|
| Heat                          | Physico-chemical modalities use thermal effect, such as heat at the skin level, affecting structures beneath the skin.                                                                                                                                                                                                                                                                         |
| Mobilization/ Manual traction | Manual treatment applied to the spine or joints of the upper or lower extremity that incorporates a low velocity and small or large amplitude oscillatory movement, within a joint's passive range of motion.                                                                                                                                                                                  |
| Orthopedic supports           | Functional assistive devices intend to align, support or otherwise indirectly facilitate function in the affected region, e.g., shoe orthotics, taping, braces.                                                                                                                                                                                                                                |
| Electrical simulation         | Electrical muscle stimulation transmits electrical impulses to muscles via electrodes placed superficially on the skin.                                                                                                                                                                                                                                                                        |
| Ultrasound                    | Ultrasound is an oscillating sound pressure wave affecting structures beneath the skin surface.                                                                                                                                                                                                                                                                                                |
| Acupuncture                   | A therapeutic technique that utilizes a thin metal needle to puncture the skin and stimulate specific points. Various acupuncture techniques exist, as well as the use of other types of stimulation in combination with or instead of a needle. Acupuncture interventions include body needling, moxibustion, electroacupuncture, laser acupuncture, microsystem acupuncture and acupressure. |

| Implementation strategies: ERIC taxonomy <sup>4-6</sup> |                                                             |                                                                                                                                                                                                    |
|---------------------------------------------------------|-------------------------------------------------------------|----------------------------------------------------------------------------------------------------------------------------------------------------------------------------------------------------|
| ERIC domain                                             | Implementation strategy                                     | Description                                                                                                                                                                                        |
| Use evaluative and iterative strategies                 | Assess for readiness and identify barriers and facilitators | Assess various aspects of an organization to determine its degree of readiness to implement, barriers that may impede implementation, and strengths that can be used in the implementation effort. |
|                                                         | Audit and provide feedback                                  | Collect and summarize clinical performance data over a specified time period and give it to clinicians and administrators to monitor, evaluate, and modify provider behavior.                      |
|                                                         | Conduct cyclical small tests of                             | Implement changes in a cyclical fashion using small tests of change before                                                                                                                         |

|                     |                                                       |                                                                                                                                                                                                                                                                                                                                                                                                  |
|---------------------|-------------------------------------------------------|--------------------------------------------------------------------------------------------------------------------------------------------------------------------------------------------------------------------------------------------------------------------------------------------------------------------------------------------------------------------------------------------------|
|                     | change                                                | taking changes system-wide. Tests of change benefit from systematic measurement, and results of the tests of change are studied for insights on how to do better. This process continues serially over time, and refinement is added with each cycle.                                                                                                                                            |
|                     | Conduct local needs assessment                        | Collect and analyze data related to the need for the innovation.                                                                                                                                                                                                                                                                                                                                 |
|                     | Develop a formal implementation blueprint             | Develop a formal implementation blueprint that includes all goals and strategies. The blueprint should include the following: 1) aim/purpose of the implementation; 2) scope of the change (e.g., what organizational units are affected); 3) timeframe and milestones; and 4) appropriate performance/progress measures. Use and update this plan to guide the implementation effort over time. |
|                     | Develop and implement tools for quality monitoring    | Develop, test, and introduce into quality-monitoring systems the right input—the appropriate language, protocols, algorithms, standards, and measures (of processes, patient/consumer outcomes, and implementation outcomes) that are often specific to the innovation being implemented.                                                                                                        |
|                     | Develop and organize quality monitoring systems       | Develop and organize systems and procedures that monitor clinical processes and/or outcomes for the purpose of quality assurance and improvement.                                                                                                                                                                                                                                                |
|                     | Obtain and use patients/consumers and family feedback | Develop strategies to increase patient/consumer and family feedback on the implementation effort.                                                                                                                                                                                                                                                                                                |
|                     | Purposely reexamine the implementation                | Monitor progress and adjust clinical practices and implementation strategies to continuously improve the quality of care.                                                                                                                                                                                                                                                                        |
|                     | Stage implementation scale up                         | Phase implementation efforts by starting with small pilots or demonstration projects and gradually move to a system wide rollout.                                                                                                                                                                                                                                                                |
| Provide interactive | Centralize technical assistance                       | Develop and use a centralized system to deliver technical assistance focused on implementation issues.                                                                                                                                                                                                                                                                                           |

|                                         |                                     |                                                                                                                                                                                      |
|-----------------------------------------|-------------------------------------|--------------------------------------------------------------------------------------------------------------------------------------------------------------------------------------|
| assistance                              | Facilitation                        | A process of interactive problem solving and support that occurs in a context of a recognized need for improvement and a supportive interpersonal relationship.                      |
|                                         | Provide clinical supervision        | Provide clinicians with ongoing supervision focusing on the innovation.<br>Provide training for clinical supervisors who will supervise clinicians who provide the innovation.       |
|                                         | Provide local technical assistance  | Develop and use a system to deliver technical assistance focused on implementation issues using local personnel.                                                                     |
| Adapt and tailor to context             | Promote adaptability                | Identify the ways a clinical innovation can be tailored to meet local needs and clarify which elements of the innovation must be maintained to preserve fidelity.                    |
|                                         | Tailor strategies                   | Tailor the implementation strategies to address barriers and leverage facilitators that were identified through earlier data collection.                                             |
|                                         | Use data experts                    | Involve, hire, and/or consult experts to inform management on the use of data generated by implementation efforts.                                                                   |
|                                         | Use data warehousing techniques     | Integrate clinical records across facilities and organizations to facilitate implementation across systems.                                                                          |
| Develop stakeholder inter-relationships | Build a coalition                   | Recruit and cultivate relationships with partners in the implementation effort.                                                                                                      |
|                                         | Capture and share local knowledge   | Capture local knowledge from implementation sites on how implementers and clinicians made something work in their setting and then share it with other sites.                        |
|                                         | Conduct local consensus discussions | Include local providers and other stakeholders in discussions that address whether the chosen problem is important and whether the clinical innovation to address it is appropriate. |
|                                         | Develop academic partnerships       | Partner with a university or academic unit for the purposes of shared training and bringing research skills to an implementation project.                                            |
|                                         | Develop an implementation glossary  | Develop and distribute a list of terms describing the innovation, implementation, and stakeholders in the organizational change.                                                     |

|                                                 |                                                                                                                                                                                                                                                                                       |
|-------------------------------------------------|---------------------------------------------------------------------------------------------------------------------------------------------------------------------------------------------------------------------------------------------------------------------------------------|
| Identify and prepare champions                  | Identify and prepare individuals who dedicate themselves to supporting, marketing, and driving through an implementation, overcoming indifference or resistance that the intervention may provoke in an organization.                                                                 |
| Identify early adopters                         | Identify early adopters at the local site to learn from their experiences with the practice innovation.                                                                                                                                                                               |
| Inform local opinion leaders                    | Inform providers identified by colleagues as opinion leaders or “educationally influential” about the clinical innovation in the hopes that they will influence colleagues to adopt it.                                                                                               |
| Involve executive boards                        | Involve existing governing structures (e.g., boards of directors, medical staff boards of governance) in the implementation effort, including the review of data on implementation processes.                                                                                         |
| Model and simulate change                       | Model or simulate the change that will be implemented prior to implementation.                                                                                                                                                                                                        |
| Obtain formal commitments                       | Obtain written commitments from key partners that state what they will do to implement the innovation.                                                                                                                                                                                |
| Organize clinician implementation team meetings | Develop and support teams of clinicians who are implementing the innovation and give them protected time to reflect on the implementation effort, share lessons learned, and support one another's learning.                                                                          |
| Promote network weaving                         | Identify and build on existing high-quality working relationships and networks within and outside the organization, organizational units, teams, etc. to promote information sharing, collaborative problem-solving, and a shared vision/goal related to implementing the innovation. |
| Recruit, designate, and train for leadership    | Recruit, designate, and train leaders for the change effort.                                                                                                                                                                                                                          |
| Use advisory boards and workgroups              | Create and engage a formal group of multiple kinds of stakeholders to provide input and advice on implementation efforts and to elicit recommendations for improvements.                                                                                                              |
| Use an implementation advisor                   | Seek guidance from experts in implementation.                                                                                                                                                                                                                                         |

|                                |                                     |                                                                                                                                                                                                                                        |
|--------------------------------|-------------------------------------|----------------------------------------------------------------------------------------------------------------------------------------------------------------------------------------------------------------------------------------|
|                                | Visit other sites                   | Visit sites where a similar implementation effort has been considered successful.                                                                                                                                                      |
| Train and educate stakeholders | Conduct educational meetings        | Hold meetings targeted toward different stakeholder groups (e.g., providers, administrators, other organizational stakeholders, and community, patient/consumer, and family stakeholders) to teach them about the clinical innovation. |
|                                | Conduct educational outreach visits | Have a trained person meet with providers in their practice settings to educate providers about the clinical innovation with the intent of changing the provider's practice.                                                           |
|                                | Conduct ongoing training            | Plan for and conduct training in the clinical innovation in an ongoing way.                                                                                                                                                            |
|                                | Create a learning collaborative     | Facilitate the formation of groups of providers or provider organizations and foster a collaborative learning environment to improve implementation of the clinical innovation.                                                        |
|                                | Develop educational materials       | Develop and format manuals, toolkits, and other supporting materials in ways that make it easier for stakeholders to learn about the innovation and for clinicians to learn how to deliver the clinical innovation.                    |
|                                | Distribute educational materials    | Distribute educational materials (including guidelines, manuals, and toolkits) in person, by mail, and/or electronically.                                                                                                              |
|                                | Make training dynamic               | Vary the information delivery methods to cater to different learning styles and work contexts, and shape the training in the innovation to be interactive.                                                                             |
|                                | Provide ongoing consultation        | Provide ongoing consultation with one or more experts in the strategies used to support implementing the innovation.                                                                                                                   |
|                                | Shadow other experts                | Provide ways for key individuals to directly observe experienced people engage with or use the targeted practice change/innovation.                                                                                                    |
|                                | Use train-the-trainer strategies    | Train designated clinicians or organizations to train others in the clinical innovation.                                                                                                                                               |
|                                | Work with educational               | Encourage educational institutions to train clinicians in the innovation.                                                                                                                                                              |

|                          |                                                                   |                                                                                                                                                                                                                       |
|--------------------------|-------------------------------------------------------------------|-----------------------------------------------------------------------------------------------------------------------------------------------------------------------------------------------------------------------|
|                          | institutions                                                      |                                                                                                                                                                                                                       |
| Support clinicians       | Create new clinical teams                                         | Change who serves on the clinical team, adding different disciplines and different skills to make it more likely that the clinical innovation is delivered (or is more successfully delivered).                       |
|                          | Develop resource sharing agreements                               | Develop partnerships with organizations that have resources needed to implement the innovation.                                                                                                                       |
|                          | Facilitate relay of clinical data to providers                    | Provide as close to real-time data as possible about key measures of process/outcomes using integrated modes/channels of communication in a way that promotes use of the targeted innovation.                         |
|                          | Remind clinicians                                                 | Develop reminder systems designed to help clinicians to recall information and/or prompt them to use the clinical innovation.                                                                                         |
|                          | Revise professional roles                                         | Shift and revise roles among professionals who provide care, and redesign job characteristics.                                                                                                                        |
| Engage consumers         | Increase demand                                                   | Attempt to influence the market for the clinical innovation to increase competition intensity and to increase the maturity of the market for the clinical innovation.                                                 |
|                          | Intervene with patients/consumers to enhance uptake and adherence | Develop strategies with patients to encourage and problem solve around adherence.                                                                                                                                     |
|                          | Involve patients/consumers and family members                     | Engage or include patients/consumers and families in the implementation effort.                                                                                                                                       |
|                          | Prepare patients/consumers to be active participants              | Prepare patients/consumers to be active in their care, to ask questions, and specifically to inquire about care guidelines, the evidence behind clinical decisions, or about available evidence-supported treatments. |
|                          | Use mass media                                                    | Use media to reach large numbers of people to spread the word about the clinical innovation.                                                                                                                          |
| Use financial strategies | Access new funding                                                | Access new or existing money to facilitate the implementation.                                                                                                                                                        |
|                          | Alter incentive/ allowance                                        | Work to incentivize the adoption and implementation of the clinical                                                                                                                                                   |



|                       |                                                       |                                                                                                                                                                                                                                                                                            |
|-----------------------|-------------------------------------------------------|--------------------------------------------------------------------------------------------------------------------------------------------------------------------------------------------------------------------------------------------------------------------------------------------|
|                       | structures                                            | innovation.                                                                                                                                                                                                                                                                                |
|                       | Alter patient/consumer fees                           | Create fee structures where patients/consumers pay less for preferred treatments (the clinical innovation) and more for less-preferred treatments.                                                                                                                                         |
|                       | Develop disincentives                                 | Provide financial disincentives for failure to implement or use the clinical innovations.                                                                                                                                                                                                  |
|                       | Fund and contract for the clinical innovation         | Governments and other payers of services issue requests for proposals to deliver the innovation, use contracting processes to motivate providers to deliver the clinical innovation, and develop new funding formulas that make it more likely that providers will deliver the innovation. |
|                       | Make billing easier                                   | Make it easier to bill for the clinical innovation.                                                                                                                                                                                                                                        |
|                       | Place innovation on fee for service lists/formularies | Work to place the clinical innovation on lists of actions for which providers can be reimbursed (e.g., a drug is placed on a formulary, a procedure is now reimbursable).                                                                                                                  |
|                       | Use capitated payments                                | Pay providers or care systems a set amount per patient/consumer for delivering clinical care.                                                                                                                                                                                              |
|                       | Use other payment schemes                             | Introduce payment approaches (in a catch-all category).                                                                                                                                                                                                                                    |
| Change infrastructure | Change accreditation or membership requirements       | Strive to alter accreditation standards so that they require or encourage use of the clinical innovation. Work to alter membership organization requirements so that those who want to affiliate with the organization are encouraged or required to use the clinical innovation.          |
|                       | Change liability laws                                 | Participate in liability reform efforts that make clinicians more willing to deliver the clinical innovation.                                                                                                                                                                              |
|                       | Change physical structure and equipment               | Evaluate current configurations and adapt, as needed, the physical structure and/or equipment (e.g., changing the layout of a room, adding equipment) to best accommodate the targeted innovation.                                                                                         |
|                       | Change record systems                                 | Change records systems to allow better assessment of implementation or clinical outcomes.                                                                                                                                                                                                  |
|                       | Change service sites                                  | Change the location of clinical service sites to increase access.                                                                                                                                                                                                                          |
|                       | Create or change credentialing                        | Create an organization that certifies clinicians in the innovation or                                                                                                                                                                                                                      |



|                                    |                                                                                                                                                                                                                                                                   |
|------------------------------------|-------------------------------------------------------------------------------------------------------------------------------------------------------------------------------------------------------------------------------------------------------------------|
| and/or licensure standards         | encourage an existing organization to do so. Change governmental professional certification or licensure requirements to include delivering the innovation. Work to alter continuing education requirements to shape professional practice toward the innovation. |
| Mandate change                     | Have leadership declare the priority of the innovation and their determination to have it implemented.                                                                                                                                                            |
| Start a dissemination organization | Identify or start a separate organization that is responsible for disseminating the clinical innovation. It could be a for-profit or non-profit organization.                                                                                                     |

### Outcome measurement: Implementation and clinical outcomes

| Type of outcome                      | Name of outcome (Synonyms)                                                                                                           | Definition                                                                                                                                                                                                                                           |
|--------------------------------------|--------------------------------------------------------------------------------------------------------------------------------------|------------------------------------------------------------------------------------------------------------------------------------------------------------------------------------------------------------------------------------------------------|
| Implementation Outcomes <sup>7</sup> | Acceptability<br>(satisfaction with various aspects of the innovation, e.g. content, complexity, comfort, delivery, and credibility) | Acceptability is the perception among implementation stakeholders that a given treatment, service, practice, or innovation is agreeable, palatable, or satisfactory.                                                                                 |
|                                      | Adoption<br>(uptake; utilization; initial implementation; intention to try)                                                          | Adoption is defined as the intention, initial decision, or action to try or employ an innovation or evidence-based practice.                                                                                                                         |
|                                      | Appropriateness; (perceived fit; relevance; compatibility; suitability; usefulness; practicability)                                  | Appropriateness is the perceived fit, relevance, or compatibility of the innovation or evidence-based practice for a given practice setting, provider, or consumer; and/or perceived fit of the innovation to address a particular issue or problem. |
|                                      | Feasibility<br>(actual fit or utility; suitability for everyday use; practicability)                                                 | Feasibility is defined as the extent to which a new treatment, or an innovation, can be successfully used or carried out within a given agency or setting.                                                                                           |
|                                      | Fidelity                                                                                                                             | Fidelity is defined as the degree to which an intervention was implemented                                                                                                                                                                           |

|                                  |                                                                                                                         |                                                                                                                                                                                                                                                                   |
|----------------------------------|-------------------------------------------------------------------------------------------------------------------------|-------------------------------------------------------------------------------------------------------------------------------------------------------------------------------------------------------------------------------------------------------------------|
|                                  | delivered as intended; adherence; integrity; quality of program delivery                                                | as it was prescribed in the original protocol or as it was intended by the program developers.                                                                                                                                                                    |
|                                  | Cost (marginal cost; cost-effectiveness; cost-benefit)                                                                  | Cost (incremental or implementation cost) is defined as the cost impact of an implementation effort. Implementation costs vary according to three components.                                                                                                     |
|                                  | Penetration (reach; level of institutionalization? Spread? Service access?)                                             | Penetration is defined as the integration of a practice within a service setting and its subsystems.                                                                                                                                                              |
|                                  | Sustainability (maintenance; continuation; durability; incorporation; integration; institutionalization; sustained use) | Sustainability is defined as the extent to which a newly implemented treatment is maintained or institutionalized within a service setting's ongoing, stable operations.                                                                                          |
| Clinical outcomes <sup>8,9</sup> | Pain intensity                                                                                                          | Impact on how much a patient hurts, reflecting the overall magnitude of the pain experience, e.g., 11-point numerical rating scale, Brief Pain Inventory.                                                                                                         |
|                                  | Physical function                                                                                                       | Impact on patient's ability to carry out daily physical activities required to meet basic needs, ranging from self-care to more complex activities that require a combination of skills, e.g., Roland Morris Disability Questionnaire, Oswestry Disability Index. |
|                                  | Quality of life                                                                                                         | Impact on physical, psychological and social domains of health, seen as distinct areas that are influenced by a person's experiences, beliefs, expectations and perceptions; Short Form-36.                                                                       |
|                                  | Global improvement                                                                                                      | An evaluation by clinician or patient of all aspects of patients' health and if there has been an improvement or decline in clinical status, e.g., Clinical Global Impression Scale, Patient Global Impression of Change Scale.                                   |

|                      |                                                                                                                                                                                                                                                    |
|----------------------|----------------------------------------------------------------------------------------------------------------------------------------------------------------------------------------------------------------------------------------------------|
| Patient satisfaction | Impact on patient's satisfaction in performing usual social roles and activities (including family and work); Impact on patient's satisfaction with care received, including treatment and care providers, e.g., Client Satisfaction Questionnaire |
| Adverse events       | Anticipated and unanticipated adverse events, e.g., worsening of condition, muscle spasm.                                                                                                                                                          |

---
